# Supplementary material for: Blood-Based Detection of Colorectal Cancer Using Cancer-Specific DNA Methylation Markers
Source: PubMed Central journal article supplement (PMC7823774; doi:10.3390/diagnostics11010051), 2020-12-31
Supplement: diagnostics-11-00051-s001.pdf [file diagnostics-11-00051-s001.pdf]

**A**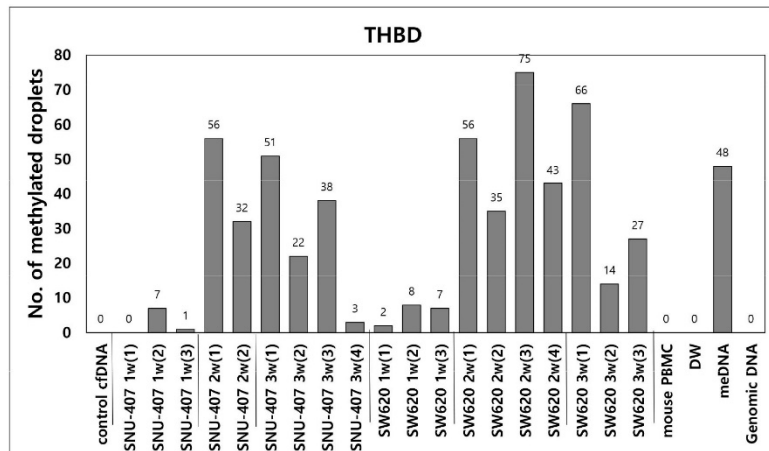**B**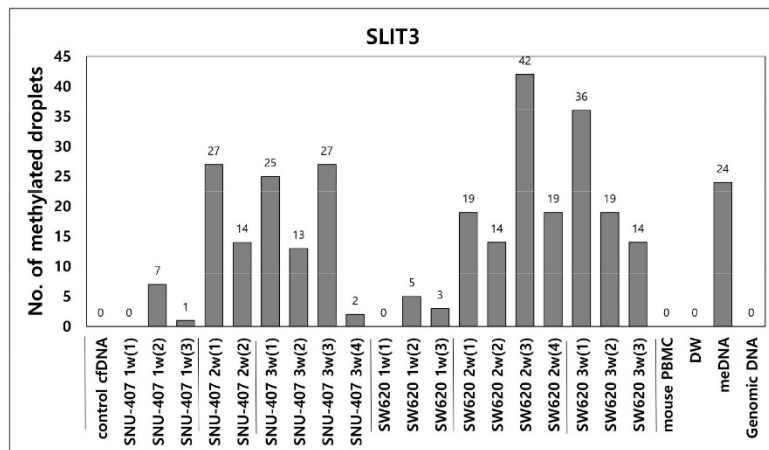

**Supplementary Figure S1.** The number of methylated droplets (A, *THBD*; B, *SLIT3*) was determined in cfDNA samples from xenografted mice that were inoculated with the SNU-407 or SW620 cell line. Xenografted mice were sacrificed before inoculation and at 1, 2, and 3 weeks after inoculation. PBMCs, bisulfite-treated genomic DNA from peripheral blood mononuclear cells of mouse; DW, distilled water; meDNA, in vitro methylated DNA (purchased from Zymo Research); genomic DNA, genomic DNA from human placental tissue without bisulfite modification.

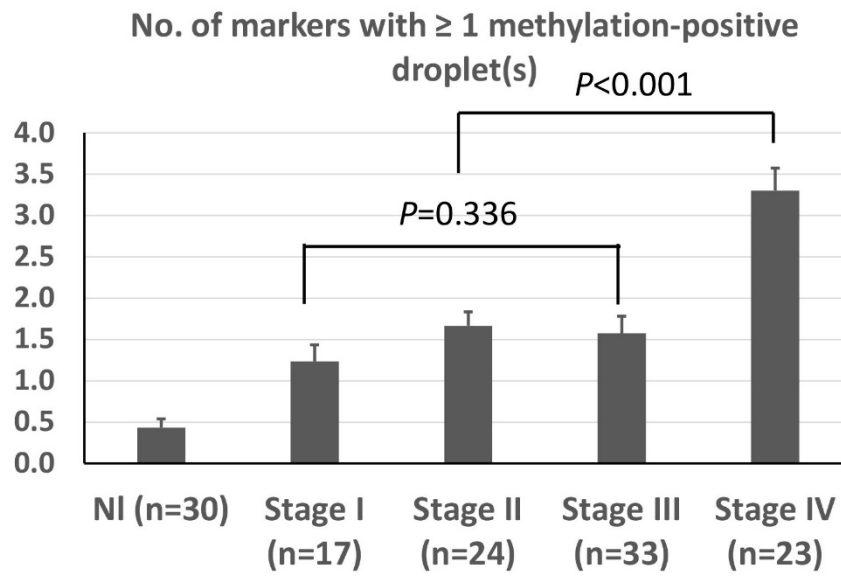

**Supplementary Figure S2.** The number of markers that showed  $\geq 1$  methylation-positive droplet(s) in cfDNA samples from healthy volunteers (NI) and patients with colorectal cancer.

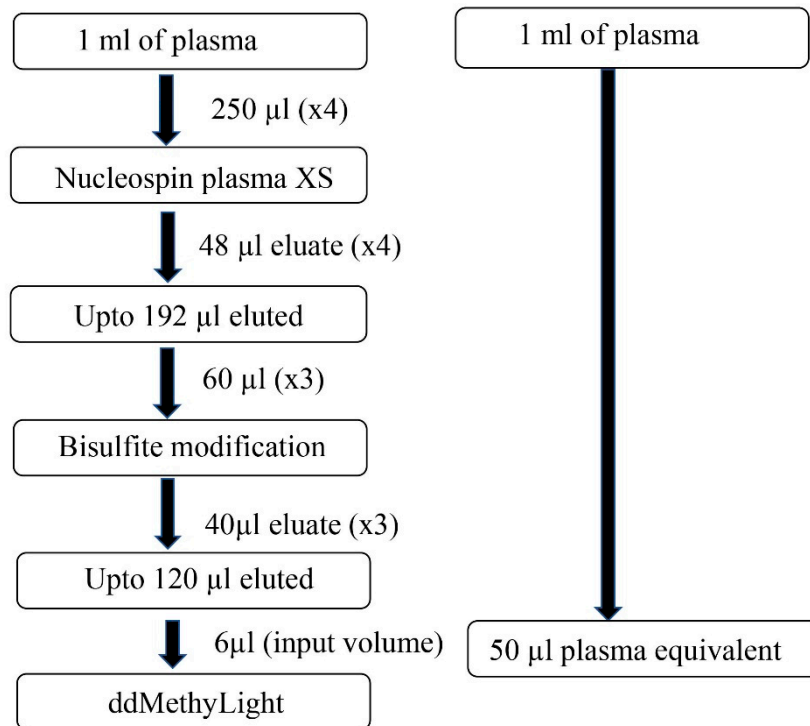

**Supplementary Figure S3.** For each droplet digital MethyLight reaction, 6 µl of modified DNA was used, which was equivalent to 50 µl of plasma.

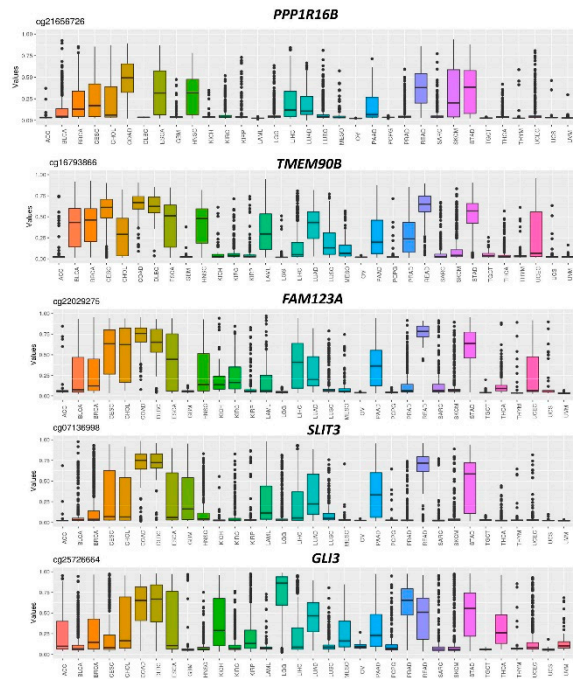

**Supplementary Figure S4.** Box plots of the beta values of five methylation markers in various tissue types of human cancers (TCGA data).

**Supplementary Table S1.** Oligonucleotide sequences of primers and probes of DNA methylation markers

| Gene         | Illumina's Cluster CpG Number | Primers & Probes | Sequence (5'-3')                          | Amplicon Size (bp) |
|--------------|-------------------------------|------------------|-------------------------------------------|--------------------|
| ADGRB1       | cg1175894<br>5                | ML192-F          | AAAATCCCGAAACGCCCGAC                      | 81                 |
|              |                               | ML192-R          | CGTAATAAGTTTGAAAGTAGCGTTAAGG              |                    |
|              |                               | ML192-Pr         | 6FAM-ACGCCCTCCCTTCGACTCGCTAACTA-BHQ-1     |                    |
| ANKRD13<br>B | cg1421547<br>2                | ML191-F          | TTTACGTCGTAGCGTTAGTTTGC                   | 100                |
|              |                               | ML191-R          | CGTCGTAACCTCCGAAACACGTA                   |                    |
|              |                               | ML191-Pr         | 6FAM-CCGCCGAAACCTAACCTAACTAAACCGA-BHQ-1   |                    |
| FAM123A      | cg2202927<br>5                | ML185-F          | CGAATAACAATAACCTAACGCGAAC                 | 107                |
|              |                               | ML185-R          | TCGTTGATAGTTTCGTCGTCGT                    |                    |
|              |                               | ML185-Pr         | 6FAM-CACTACTAACGAAAACGACTTATCCCGCCG-BHQ-1 |                    |
| GLI3         | cg2572666<br>4                | ML183-F          | TACGAGTGTTAGGGCGCGTA                      | 88                 |
|              |                               | ML183-R          | AAAACCCGAACGTAATATCACCC                   |                    |
|              |                               | ML183-Pr         | 6FAM-TCTTCTCTCCACACCGCCAAAACACC-BHQ-1     |                    |
| PCDHG        | cg0445318<br>0                | ML190-F          | TCCAATTAATACTAACGACGTTAAACGA              | 95                 |
|              |                               | ML190-R          | CGTATTGTTATTGCGGTTTAGTATTTGA              |                    |
|              |                               | ML190-Pr         | 6FAM-CCCAACTCTCTCCGCCAACCTACCTATTC-BHQ-1  |                    |
| PPP1R16B     | cg2165672<br>6                | ML186-F          | GAGCGTCGGGATTTTGTTCG                      | 92                 |
|              |                               | ML186-R          | CCCCAAAACGAAACCTAAACTCC                   |                    |
|              |                               | ML186-Pr         | 6FAM-AACTAAAATAAACGCGCTCAACCCCATCCG-BHQ-1 |                    |
| SLIT3        | cg0713699<br>8                | ML166-F          | CGTGTTTATTGAATGGAGAGAGCG                  | 79                 |
|              |                               | ML166-R          | AAAACGCGACGACTACGACTA                     |                    |
|              |                               | ML166-Pr         | 6FAM-ACACGAAACGACCGAATAAACTAACCGACG-BHQ1  |                    |
| TMEM90B      | cg1679386<br>6                | ML182-F          | AAATACGCTAACGCCCGGAC                      | 92                 |
|              |                               | ML182-R          | CGGTCGGTGTTTGTGTATTAATATTAG               |                    |
|              |                               | ML182-Pr         | 6FAM-CGAACCGATACCTACGCCTCCCTAACCA-BHQ-1   |                    |

**Supplementary Table S2.** AUC values of 10 methylation markers.

| 1 Droplet       | AUC   | 95% C.I. |       |
|-----------------|-------|----------|-------|
|                 |       | Lower    | Upper |
| <i>GLI3</i>     | 0.692 | 0.616    | 0.768 |
| <i>TMEM90B</i>  | 0.689 | 0.613    | 0.766 |
| <i>PPP1R16B</i> | 0.677 | 0.598    | 0.755 |
| <i>PCDHG</i>    | 0.661 | 0.580    | 0.741 |
| <i>ANKRD13B</i> | 0.656 | 0.577    | 0.736 |
| <i>ADGRB1</i>   | 0.616 | 0.533    | 0.700 |
| <i>THBD</i>     | 0.610 | 0.528    | 0.693 |
| <i>FAM123A</i>  | 0.600 | 0.517    | 0.684 |
| <i>c9orf50</i>  | 0.591 | 0.506    | 0.676 |
| <i>SLIT3</i>    | 0.589 | 0.504    | 0.673 |

**Supplementary Table S3.** The number of methylated droplets in cfDNA samples from patients with stage I-IV CRC

|                 | Stage I<br>(n=17) | Stage II<br>(n=24) | Stage III<br>(n=33) | Stage IV (n=23) | P-value (stage I-III) | P-value<br>(stage I-IV) |
|-----------------|-------------------|--------------------|---------------------|-----------------|-----------------------|-------------------------|
| <i>FAM123A</i>  | 0.18              | 0.17               | 0.09                | 29.48           | 0.595                 | <0.001                  |
| <i>PPP1R16B</i> | 0.41              | 0.46               | 0.48                | 74.87           | 0.755                 | 0.033                   |
| <i>TMEM90B</i>  | 0.35              | 0.50               | 0.39                | 65.96           | 0.593                 | <0.001                  |
| <i>GLI3</i>     | 0.42              | 0.18               | 0.46                | 13.43           | 0.090                 | 0.015                   |
| <i>SLIT3</i>    | 0.12              | 0.08               | 0.18                | 26.13           | 0.531                 | <0.001                  |
| <i>PCDHG</i>    | 0.47              | 0.33               | 0.48                | 14.04           | 0.445                 | 0.005                   |
| <i>ANKRD13B</i> | 0.35              | 0.46               | 0.30                | 13.61           | 0.368                 | 0.003                   |
| <i>ADGRB1</i>   | 0.53              | 0.33               | 0.36                | 29.74           | 0.441                 | 0.006                   |
| <i>THBD</i>     | 0.29              | 0.33               | 0.18                | 87.13           | 0.412                 | <0.001                  |
| <i>C9orf50</i>  | 0.47              | 0.08               | 0.21                | 25.13           | 0.016                 | <0.001                  |

**Supplementary Table S4.** The percentage of healthy volunteers or CRC patients who have tested positive for each marker at each stage.

|                 | NI (n=60) | Stage I<br>(n=17) | Stage II<br>(n=24) | Stage III<br>(n=33) | Stage IV<br>(n=23) | P-value |
|-----------------|-----------|-------------------|--------------------|---------------------|--------------------|---------|
| <i>FAM123A</i>  | 3.3%      | 17.6%             | 16.7%              | 9.1%                | 56.5%              | <0.001  |
| <i>PPP1R16B</i> | 13.3%     | 41.2%             | 45.8%              | 48.5%               | 69.6%              | <0.001  |
| <i>TMEM90B</i>  | 18.3%     | 35.3%             | 50.0%              | 39.4%               | 87.0%              | <0.001  |
| <i>GLI3</i>     | 6.7%      | 17.6%             | 45.8%              | 42.4%               | 56.5%              | <0.001  |
| <i>SLIT3</i>    | 5.0%      | 11.8%             | 8.3%               | 18.2%               | 60.9%              | <0.001  |
| <i>PCDHG</i>    | 18.3%     | 47.1%             | 33.3%              | 48.5%               | 73.9%              | <0.001  |
| <i>ANKRD13B</i> | 11.7%     | 35.3%             | 45.8%              | 30.3%               | 65.2%              | <0.001  |
| <i>ADGRB1</i>   | 28.3%     | 52.9%             | 33.3%              | 36.4%               | 65.2%              | <0.001  |
| <i>THBD</i>     | 21.7%     | 29.4%             | 33.3%              | 18.2%               | 82.6%              | <0.001  |
| <i>C9orf50</i>  | 15.0%     | 47.1%             | 8.3%               | 21.2%               | 65.2%              | <0.001  |
